# Supplementary material
Source: PubMed Central journal article supplement (PMC3245210)
Supplement: supp_blood-2011-08-373159_Document1.pdf [file supp_blood-2011-08-373159_Document1.pdf]

### **Mutation analysis of *SF3B1***

Mutational analysis of *SF3B1* (exons 1–25, including splicing sites; RefSeq NM\_012433.2) was performed on PCR amplicons obtained from genomic DNA by a combination of Sanger sequencing (performed on an ABI PRISM 3100 Genetic Analyzer, Applied Biosystems) and targeted next generation sequencing (performed on a Genome Sequencer Junior, 454 Life Sciences, Roche, Branford, CT; mean coverage ~200×). Sanger sequences were compared to the corresponding germline RefSeq using Mutation Surveyor Version 2.41 (SoftGenetics, State College, PA) after both automated and manual curation. Sequencing reads obtained by next generation sequencing were mapped on RefSeq using the Amplicon Variant Analyzer software package (Roche). All sequence variants identified by Sanger sequencing or next generation sequencing were subsequently confirmed by Sanger sequencing from both strands on independent amplicons. Synonymous mutations, germline polymorphisms known from databases (dbSNP132, Ensembl Database, UCSC Genome Browser), and changes present in matched normal DNA were removed from the analysis. Molecular studies were performed in blind with respect to clinical data. All PCR primers and conditions are available upon request. The prediction of functional effects of the amino acid substitutions was performed by using the PolyPhen-2 algorithm (Software version 2.1, <http://genetics.bwh.harvard.edu/pph2>).<sup>1</sup>

### **Analysis of FISH karyotype and of *IGHV*, *TP53* and *NOTCH1* mutations**

FISH analysis was performed as reported using probes LS113 and LSID13S319, CEP12, LSIp53, and LSIATM (Abbott, Rome, Italy).<sup>2</sup> For each probe, at least 400 interphase cells with well-delineated fluorescent spots were examined. The presence of 13q14 deletion, trisomy 12, 11q22–q23 deletion and 17p13 deletion was scored when the percentage of nuclei with the abnormality was above our internal cut off (5%, 5%, 7%, and 10% respectively), defined as the mean plus 3 standard deviations of the frequency of normal control cells exhibiting the abnormality. *IGHV* mutational status was investigated as previously reported.<sup>3</sup> Sequences were aligned to the ImMunoGeneTics sequence directory and considered mutated if identity to corresponding germline genes was <98%.<sup>4,5</sup> *TP53* (exons 4–8; RefSeq NM\_000546.4) and *NOTCH1* (exons 26, 27 and 34; RefSeq NM\_017617.2) were analysed by Sanger sequencing as reported.<sup>2,6</sup> The regions of *TP53* and *NOTCH1* that have been analysed represent the mutation hotspots in CLL.<sup>2,6</sup>

### **Copy number analysis**

Genome-wide DNA profiles were obtained from high molecular weight genomic DNA of CLL patients using the Affymetrix Genome-Wide Human SNP Array 6.0 (Affymetrix, Santa Clara, CA, USA), following the manufacturer's instructions. The bioinformatics pipeline used for the identification of copy number alterations is described in detail in Supplementary References 7 and 8.

### **Gene expression profile analysis**

Gene expression profile analysis of purified normal B cell subpopulations and CLL samples was performed using Affymetrix HG-U133\_plus2 arrays as part of an independent study (GEO database GSE12195). The probes used in Fig. 2D are the following: 228758\_at, 203140\_at, and 215990\_s\_at (for *BCL6*); 219841\_at and 224499\_s\_at (for *AICDA*); 203684\_s\_at and 203685\_at (for *BCL2*); 204562\_at and 216986\_s\_at (for *IRF4*); and 201070\_x\_at, 201071\_x\_at, 211185\_s\_at, and 214305\_s\_at (for *SF3B1*).

## Statistical analysis

Over-all survival was measured from date of diagnosis to date of death (event) or of last follow-up (censoring). Treatment free survival was measured from date of diagnosis to date of progressive and symptomatic disease requiring treatment according to IWCLL-NCI guidelines (event), death, or last follow up (censoring).<sup>9</sup> Survival was estimated by the Kaplan-Meier method.<sup>10</sup> The crude association between *SF3B1* mutations and survival was estimated by log-rank analysis.<sup>10</sup> The independence of *SF3B1* mutations as a predictor of CLL OS was estimated after controlling for confounding variables by multivariate Cox regression analysis.<sup>11–13</sup> The following variables were included in multivariate analysis: *SF3B1* mutations (present vs absent), age (>65 years vs ≤65 years), Rai stage (III–IV vs 0–II), *IGHV* identity ≥98% (present vs absent), 11q22–q23 deletion (present vs absent), *TP53* disruption by mutation and/or deletion (present vs absent), and *ZAP70* expression (≥20% vs <20%). None of the covariates violated the proportional hazard assumption as documented by plotting the smoothed Schoenfeld residuals, and by performing a correlation test between time and residuals.<sup>12–14</sup> The assumption of effect additivity of predictors was not violated, as documented by a global test of additivity including interactions between *SF3B1* mutations and other covariates.<sup>12,13</sup> None of the covariates showed colinearity.<sup>12,13</sup> The prediction accuracy of the multivariate model was verified by assessing model discrimination and calibration.<sup>12,13,15</sup>

Categorical variables were compared by chi-square test and exact tests when appropriate. All statistical tests were two-sided. Statistical significance was defined as p value <.05. The analysis was performed with the Statistical Package for the Social Sciences (SPSS) software v.18.0 (Chicago, IL) and with R statistical package 2.13.0 (<http://www.r-project.org>).

## REFERENCES

1. Adzhubei IA, Peshkin L, Ramensky VE, et al. A method and server for predicting damaging missense mutations. *Nat Methods*. 2010;7(4):248–249.
2. Rossi D, Cerri M, Deambrogi C, et al. The prognostic value of TP53 mutations in chronic lymphocytic leukemia is independent of Del17p13: implications for over-all survival and chemorefractoriness. *Clin Cancer Res*. 2009;15(3):995–1004.
3. Rossi D, Spina V, Cerri M, et al. Stereotyped B-cell receptor is an independent risk factor of chronic lymphocytic leukemia transformation to Richter syndrome. *Clin Cancer Res*. 2009;15(13):4415–4422.
4. Hamblin TJ, Davis Z, Gardiner A, et al. Unmutated Ig V(H) genes are associated with a more aggressive form of chronic lymphocytic leukemia. *Blood*. 1999;94(6):1848–1854.
5. Damle RN, Wasil T, Fais F, et al. Ig V gene mutation status and CD38 expression as novel prognostic indicators in chronic lymphocytic leukemia. *Blood*. 1999;94(6):1840–1847.
6. Fabbri G, Rasi S, Rossi D, et al. Analysis of the chronic lymphocytic leukemia coding genome: role of NOTCH1 mutational activation. *J Exp Med*. 2011;208(7):1389–1401.
7. Pasqualucci L, Trifonov V, Fabbri G, et al. Analysis of the coding genome of diffuse large B-cell lymphoma. *Nat Genet*. 2011; doi: 10.1038/ng.892.
8. Rinaldi A, Mian M, Kwee I, et al. Genome-wide DNA profiling better defines the prognosis of chronic lymphocytic leukaemia. *Br J Haematol*. 2011; doi: 10.1111/j.1365–2141.2011.08789.x.

9. Hallek M, Cheson BD, Catovsky D, et al. Guidelines for the diagnosis and treatment of chronic lymphocytic leukemia: a report from the International Workshop on Chronic Lymphocytic Leukemia updating the National Cancer Institute-Working Group 1996 guidelines. *Blood*. 2008;111(12):5446–5456.
10. Kaplan EL, Meier P. Nonparametric estimation from incomplete observations. *Am Stat Assoc*. 1958;53:457–481.
11. Cox DR. Regression models and life tables. *J R Stat Assoc*. 1972; 34:187–220.
12. Harrell FE Jr, Lee K, Mark DB. Multivariable prognostic models: issues in developing models, evaluating assumptions and adequacy, and measuring and reducing errors. *Stat Med*. 1996;15(4):361–387.
13. Harrell FE Jr. *Regression modeling strategies*. New York, NY: Springer-Verlag; 2001: 465–522.
14. Schoenfeld D. Partial residuals for the proportional hazard regression model. *Biometrika*. 1982;69(1):239–241.
15. van Houwelingen JC, le Cessie S: Predictive value of statistical models. *Stat Med*. 1990;9(1):1303–1325.

**Table S1. Clinical and biological characteristics of the fludarabine-refractory CLL cohort<sup>a</sup>**

|                                     | All<br>(n=59) |      | <i>SF3B1</i> mutated<br>(n=10) |      | <i>SF3B1</i> wt<br>(n=49) |      | p           |
|-------------------------------------|---------------|------|--------------------------------|------|---------------------------|------|-------------|
|                                     | Number        | %    | Number                         | %    | Number                    | %    |             |
| Age >65 years                       | 37            | 62.7 | 6                              | 60.0 | 31                        | 63.0 | 1.000       |
| Male                                | 40            | 67.8 | 7                              | 70.0 | 33                        | 67.3 | 1.000       |
| Rai stage III-IV                    | 28            | 47.5 | 7                              | 70.0 | 21                        | 42.9 | .168        |
| Number of prior therapies           |               |      |                                |      |                           |      | .264        |
| 0                                   | 26            | 44.1 | 4                              | 40.0 | 22                        | 44.9 |             |
| 1                                   | 24            | 40.7 | 6                              | 60.0 | 18                        | 36.7 |             |
| >1                                  | 9             | 15.3 | 0                              | 0    | 9                         | 18.4 |             |
| Treatment regimen at refractoriness |               |      |                                |      |                           |      | .750        |
| FCR                                 | 17            | 28.8 | 4                              | 40.0 | 13                        | 26.5 |             |
| FR                                  | 3             | 5.1  | 0                              | 0    | 3                         | 6.1  |             |
| FC                                  | 19            | 32.2 | 2                              | 20.0 | 17                        | 34.7 |             |
| F                                   | 20            | 33.8 | 4                              | 40.0 | 16                        | 32.7 |             |
| <i>IGHV</i> identity $\geq$ 98%     | 48            | 81.4 | 8                              | 80.0 | 40                        | 81.6 | 1.000       |
| CD38 $\geq$ 30%                     | 34            | 57.6 | 6                              | 60.0 | 28                        | 57.1 | 1.000       |
| ZAP70 $\geq$ 20%                    | 39            | 66.1 | 6                              | 60.0 | 33                        | 67.3 | .721        |
| <i>TP53</i> disruption              | 23            | 39.0 | 1                              | 10.0 | 22                        | 44.9 | .072        |
| <i>NOTCH1</i> mutations             | 14            | 23.7 | 1                              | 10.0 | 13                        | 26.5 | .425        |
| 11q22-q23 deletion                  | 15            | 25.4 | 3                              | 30.0 | 12                        | 24.5 | .704        |
| Trisomy 12                          | 16            | 27.1 | 0                              | 0    | 16                        | 32.7 | <b>.049</b> |
| 13q14 deletion                      | 31            | 52.5 | 6                              | 60.0 | 25                        | 51.1 | .734        |
| Normal FISH                         | 10            | 16.9 | 5                              | 50.0 | 5                         | 10.2 | <b>.008</b> |

<sup>a</sup> wt, wild type; FCR, fludarabine, cyclophosphamide, rituximab; FR, fludarabine, rituximab; FC, fludarabine, cyclophosphamide; F, fludarabine; *IGHV*, immunoglobulin heavy variable gene; FISH, fluorescence in situ hybridization

**Table S2. Clinical and biological characteristics of the consecutive series of newly diagnosed and previously untreated CLL<sup>a</sup>**

|                                 | All     |      | <i>SF3BI</i> mutated |      | <i>SF3BI</i> wt |      | p           |
|---------------------------------|---------|------|----------------------|------|-----------------|------|-------------|
|                                 | Number  | %    | Number               | %    | Number          | %    |             |
| Age >65 years                   | 183/301 | 60.8 | 13/17                | 76.5 | 170/284         | 59.9 | .173        |
| Male                            | 163/301 | 54.2 | 13/17                | 76.5 | 150/284         | 52.8 | .057        |
| Rai stage III-IV                | 33/301  | 11.0 | 7/17                 | 41.2 | 26/284          | 9.2  | <b>.001</b> |
| <i>IGHV</i> identity $\geq$ 98% | 100/294 | 34.0 | 8/17                 | 47.1 | 92/277          | 33.2 | .242        |
| CD38 $\geq$ 30%                 | 81/298  | 27.2 | 7/17                 | 41.2 | 74/281          | 26.3 | .259        |
| ZAP70 $\geq$ 20%                | 77/253  | 30.0 | 8/13                 | 61.5 | 69/240          | 28.7 | <b>.025</b> |
| <i>TP53</i> disruption          | 30/301  | 10.0 | 1/17                 | 5.9  | 29/284          | 10.2 | 1.000       |
| <i>NOTCH1</i> mutations         | 34/301  | 11.3 | 1/17                 | 5.9  | 33/284          | 11.6 | .704        |
| 11q22-q23 deletion              | 21/301  | 7.0  | 2/17                 | 11.8 | 19/284          | 6.7  | .336        |
| Trisomy 12                      | 58/301  | 19.3 | 1/17                 | 5.9  | 57/284          | 20.1 | .211        |
| 13q14 deletion                  | 157/301 | 52.2 | 8/17                 | 47.1 | 149/284         | 52.5 | .665        |
| Normal FISH                     | 89/301  | 29.6 | 8/17                 | 47.1 | 81/284          | 28.5 | .104        |

<sup>a</sup> wt, wild type; *IGHV*, immunoglobulin heavy variable gene; FISH, fluorescence in situ hybridization

**Table S3. Clinical and biological characteristics of the RS cohort<sup>a</sup>**

|                                            | Number (n=33) | %    |
|--------------------------------------------|---------------|------|
| <b>Clinical features at RS diagnosis</b>   |               |      |
| Age >65 years                              | 19            | 57.6 |
| Male                                       | 22            | 66.7 |
| ECOG PS >1                                 | 13            | 39.3 |
| Ann Arbor stage III-IV                     | 33            | 100  |
| Rai stage III-IV                           | 14            | 42.4 |
| B symptoms                                 | 13            | 39.3 |
| Tumor size >5 cm                           | 24            | 72.7 |
| Platelets <100 x 10 <sup>9</sup> /L        | 7             | 21.2 |
| LDH >1.5 ULN                               | 17            | 51.5 |
| Prior CLL therapies >1                     | 7             | 21.2 |
| <b>Pathologic features at RS diagnosis</b> |               |      |
| Non-GC phenotype                           | 32            | 96.9 |
| EBV infection                              | 0             | 0    |
| <b>Genetic features</b>                    |               |      |
| <i>TP53</i> disruption                     | 18            | 54.5 |
| <i>c-MYC</i> aberrations                   | 5             | 15.1 |
| <i>NOTCH1</i> mutations                    | 13            | 39.4 |
| <i>IGHV</i> identity ≥98%                  | 24            | 72.7 |

<sup>a</sup> ULN, upper limit of normal; GC, germinal center; *IGHV*, immunoglobulin heavy variable gene

**Table S4. SF3B1 mutations in CLL and RS**

| Sample ID            | Disease phase                           | Nucleotide change <sup>c</sup> | Amino acid change <sup>d</sup> | Affected domain | Conserved site <sup>e</sup> | PolyPhen-2 <sup>f</sup> | Score | COSMIC v54 <sup>g</sup> |
|----------------------|-----------------------------------------|--------------------------------|--------------------------------|-----------------|-----------------------------|-------------------------|-------|-------------------------|
| 7040 <sup>a</sup>    | CLL diagnosis                           | c.2044A>G                      | p.K666E                        | HEAT4           | No                          | Damaging                | 1.000 | No                      |
| 11772 <sup>a</sup>   | CLL diagnosis                           | c.2044A>G                      | p.K666E                        | HEAT4           | No                          | Damaging                | 1.000 | No                      |
| 9094                 | CLL diagnosis                           | c.2046G>T                      | p.K666N                        | HEAT4           | No                          | Damaging                | 1.000 | No                      |
| 4602 <sup>a</sup>    | CLL diagnosis                           | c.2146A>G                      | p.K700E                        | HEAT5           | Yes                         | Damaging                | 1.000 | Yes                     |
| 4681 <sup>a</sup>    | CLL diagnosis                           | c.2146A>G                      | p.K700E                        | HEAT5           | Yes                         | Damaging                | 1.000 | Yes                     |
| 7561 <sup>a</sup>    | CLL diagnosis                           | c.2146A>G                      | p.K700E                        | HEAT5           | Yes                         | Damaging                | 1.000 | Yes                     |
| 10676 <sup>a</sup>   | CLL diagnosis                           | c.2146A>G                      | p.K700E                        | HEAT5           | Yes                         | Damaging                | 1.000 | Yes                     |
| 11196 <sup>a</sup>   | CLL diagnosis                           | c.2146A>G                      | p.K700E                        | HEAT5           | Yes                         | Damaging                | 1.000 | Yes                     |
| 11197 <sup>a</sup>   | CLL diagnosis                           | c.2146A>G                      | p.K700E                        | HEAT5           | Yes                         | Damaging                | 1.000 | Yes                     |
| 11489 <sup>a</sup>   | CLL diagnosis                           | c.2146A>G                      | p.K700E                        | HEAT5           | Yes                         | Damaging                | 1.000 | Yes                     |
| 11785 <sup>a</sup>   | CLL diagnosis                           | c.2146A>G                      | p.K700E                        | HEAT5           | Yes                         | Damaging                | 1.000 | Yes                     |
| 3950 <sup>a</sup>    | CLL diagnosis                           | c.2267G>A                      | p.G740E                        | -               | Yes                         | Damaging                | 0.949 | No                      |
| 4845 <sup>a</sup>    | Fludarabine-refractory CLL <sup>b</sup> | c.1938A>T                      | p.R630S                        | HEAT3           | Yes                         | Damaging                | 1.000 | No                      |
| 7425 <sup>a</sup>    | Fludarabine-refractory CLL <sup>b</sup> | c.2034C>A                      | p.H662Q                        | HEAT4           | Yes                         | Damaging                | 1.000 | No                      |
| 7228                 | Fludarabine-refractory CLL <sup>b</sup> | c.2034C>A                      | p.H662Q                        | HEAT4           | Yes                         | Damaging                | 1.000 | No                      |
| 12627                | Fludarabine-refractory CLL              | c.2032C>G                      | p.H662D                        | HEAT4           | Yes                         | Damaging                | 1.000 | No                      |
| 7915 <sup>a</sup>    | Fludarabine-refractory CLL              | c.2044A>G                      | p.K666E                        | HEAT4           | No                          | Damaging                | 1.000 | No                      |
| 12571                | Fludarabine-refractory CLL              | c.2146A>G                      | p.K700E                        | HEAT5           | Yes                         | Damaging                | 1.000 | Yes                     |
| 12631                | Fludarabine-refractory CLL              | c.2146A>G                      | p.K700E                        | HEAT5           | Yes                         | Damaging                | 1.000 | Yes                     |
| 14220_R <sup>a</sup> | Fludarabine-refractory CLL              | c.2146A>G                      | p.K700E                        | HEAT5           | Yes                         | Damaging                | 1.000 | Yes                     |
| 3981 <sup>a</sup>    | Fludarabine-refractory CLL <sup>b</sup> | c.2146A>G                      | p.K700E                        | HEAT5           | Yes                         | Damaging                | 1.000 | Yes                     |
| 5565 <sup>a</sup>    | Fludarabine-refractory CLL <sup>b</sup> | c.2143_2148delCAGAAA           | p.delQ699_K700                 | HEAT5           | Yes                         | na                      | na    | No                      |
| 8343                 | Richter syndrome                        | c.2056C>G                      | p.Q670E                        | HEAT4           | Yes                         | Damaging                | 0.999 | No                      |
| 7509 <sup>a</sup>    | Richter syndrome                        | c.2146A>G                      | p.K700E                        | HEAT5           | Yes                         | Damaging                | 1.000 | Yes                     |

<sup>a</sup> For these patients, paired normal DNA was available and confirmed the somatic origin of the mutation

<sup>b</sup> In these patients, the time of fludarabine-refractoriness was concomitant with clinical diagnosis

<sup>c</sup> Numbering according to GenBank accession No. NM\_012433.2

<sup>d</sup> Numbering according to GenBank accession No. NP\_036565.2

<sup>e</sup> Position conserved among SF3B1 orthologues

<sup>f</sup> na, not applicable, since the PolyPhen-2 algorithm predicts only the impact of amino acid substitutions

<sup>g</sup> Mutations listed in the Catalog of Somatic Mutations in Cancer (COSMIC) database v54 release (<http://www.sanger.ac.uk/genetics/CGP/cosmic/>)

**Table S5. Distribution of genetic lesions according to *IGHV* mutation status<sup>a</sup>**

|                         | <i>IGHV</i> identity $\geq$ 98% |          | <i>IGHV</i> identity <98% |          | <b>p</b> |
|-------------------------|---------------------------------|----------|---------------------------|----------|----------|
|                         | <b>Number</b>                   | <b>%</b> | <b>Number</b>             | <b>%</b> |          |
| <i>SF3B1</i> mutations  | 8/100                           | 8.0      | 9/194                     | 4.6      | .242     |
| <i>TP53</i> disruption  | 13/100                          | 13.0     | 17/194                    | 8.8      | .256     |
| <i>NOTCH1</i> mutations | 26/100                          | 26.0     | 8/194                     | 4.1      | <.001    |
| <i>ATM</i> deletion     | 15/100                          | 15.0     | 6/194                     | 3.1      | <.001    |

<sup>a</sup> *IGHV*, immunoglobulin heavy variable gene



**Table S6. Univariate and multivariate analysis for overall survival in newly diagnosed and previously untreated CLL<sup>a</sup>**

| Characteristics           | Univariate analysis |      |      |       | Multivariate analysis |      |      |       |
|---------------------------|---------------------|------|------|-------|-----------------------|------|------|-------|
|                           | HR                  | LCI  | UCI  | p     | HR                    | LCI  | UCI  | p     |
| <i>SF3B1</i> wild type    | -                   | -    | -    |       | -                     | -    | -    |       |
| <i>SF3B1</i> mutated      | 3.33                | 1.51 | 7.32 | .003  | 3.02                  | 1.24 | 7.35 | .015  |
| Age ≤ 65 years            | -                   | -    | -    |       | -                     | -    | -    |       |
| Age >65 years             | 2.71                | 1.60 | 4.58 | <.001 | 3.17                  | 1.68 | 5.97 | <.001 |
| Rai stage 0-II            | -                   | -    | -    |       | -                     | -    | -    |       |
| Rai stage III-IV          | 5.60                | 3.45 | 9.10 | <.001 | 3.33                  | 1.71 | 6.48 | <.001 |
| <i>IGHV</i> identity <98% | -                   | -    | -    |       | -                     | -    | -    |       |
| <i>IGHV</i> identity ≥98% | 1.92                | 1.22 | 3.00 | .004  | 1.38                  | 0.79 | 2.40 | .252  |
| No 11q22-q23 deletion     | -                   | -    | -    |       | -                     | -    | -    |       |
| 11q22-q23 deletion        | 3.20                | 1.72 | 5.97 | <.001 | 1.87                  | 0.81 | 4.26 | .137  |
| <i>TP53</i> wild type     | -                   | -    | -    |       | -                     | -    | -    |       |
| <i>TP53</i> disruption    | 3.77                | 2.19 | 6.50 | <.001 | 3.14                  | 1.71 | 5.79 | <.001 |
| <i>ZAP70</i> <20%         | -                   | -    | -    |       | -                     | -    | -    |       |
| <i>ZAP70</i> ≥20%         | 1.52                | 0.90 | 2.58 | .116  | 0.99                  | 0.55 | 1.76 | .977  |

<sup>a</sup> HR, hazard ratio; LCI, 95% lower confidence interval; UCI, 95% upper confidence interval; *IGHV*, immunoglobulin heavy variable gene

**Table S7. *SF3B1* mutations in mature B-cell neoplasia**

|                                   | <b>Number</b> | <b>%</b> |
|-----------------------------------|---------------|----------|
| Fludarabine-refractory CLL        | 10/59         | 16.9     |
| CLL diagnosis                     | 17/301        | 5.6      |
| Richter syndrome                  | 2/33          | 6.0      |
| Diffuse large B-cell lymphoma     | 0/20          | 0        |
| Follicular lymphoma               | 0/20          | 0        |
| Mantle cell lymphoma              | 0/20          | 0        |
| Extranodal marginal zone lymphoma | 0/21          | 0        |
| Splenic marginal zone lymphoma    | 0/18          | 0        |
| Hairy cell leukemia               | 0/17          | 0        |
| Multiple myeloma                  | 0/20          | 0        |

**Figure S1. Distribution of genetic lesions in relation to *IGHV* gene usage**

The bar graphs represent the prevalence of *SF3B1* mutations (Panel A; present: red bars; absent: grey bars), *TP53* disruption (Panel B; present: red bars; absent: grey bars), *NOTCH1* mutations (Panel C; present: red bars; absent: grey bars), and *ATM* deletion (Panel D; present: red bars; absent: grey bars) within CLL subgroups defined by *IGHV* gene usage (only *IGHV* gene subgroups including >5 CLL cases are represented).

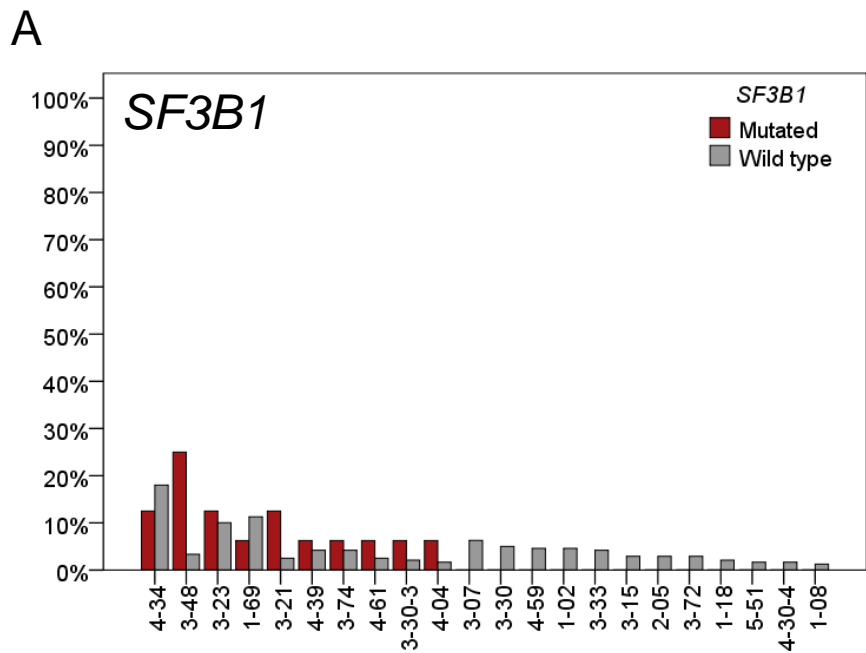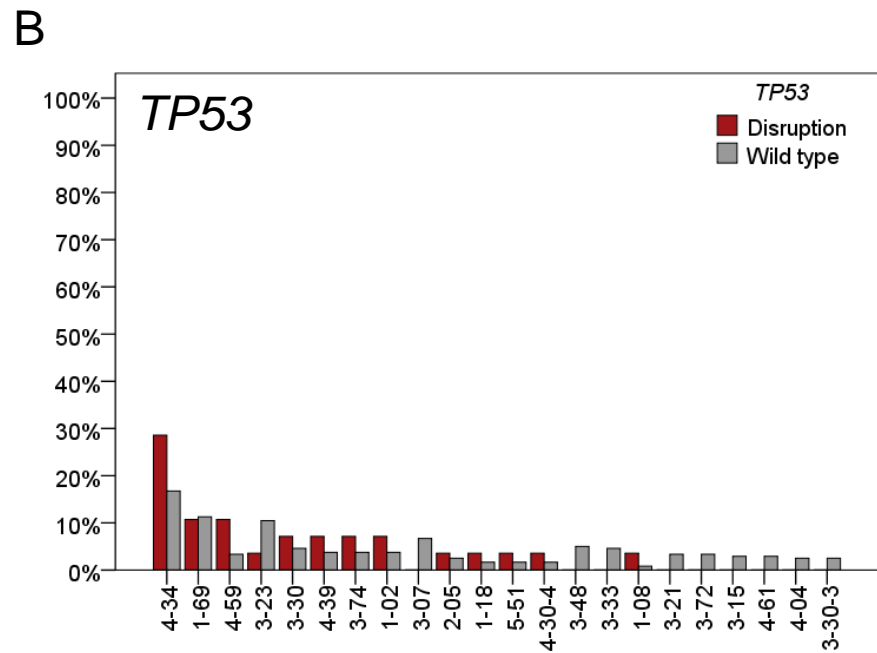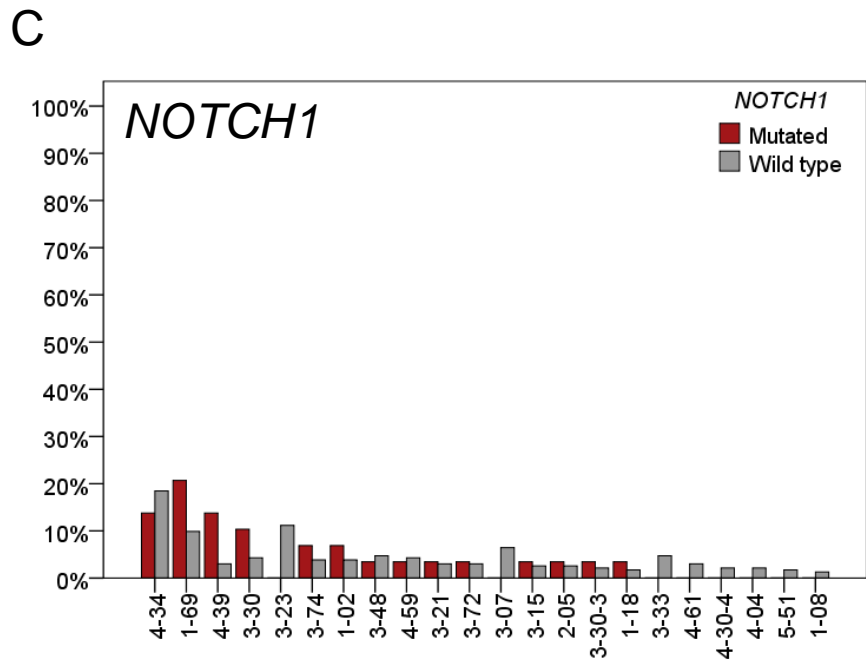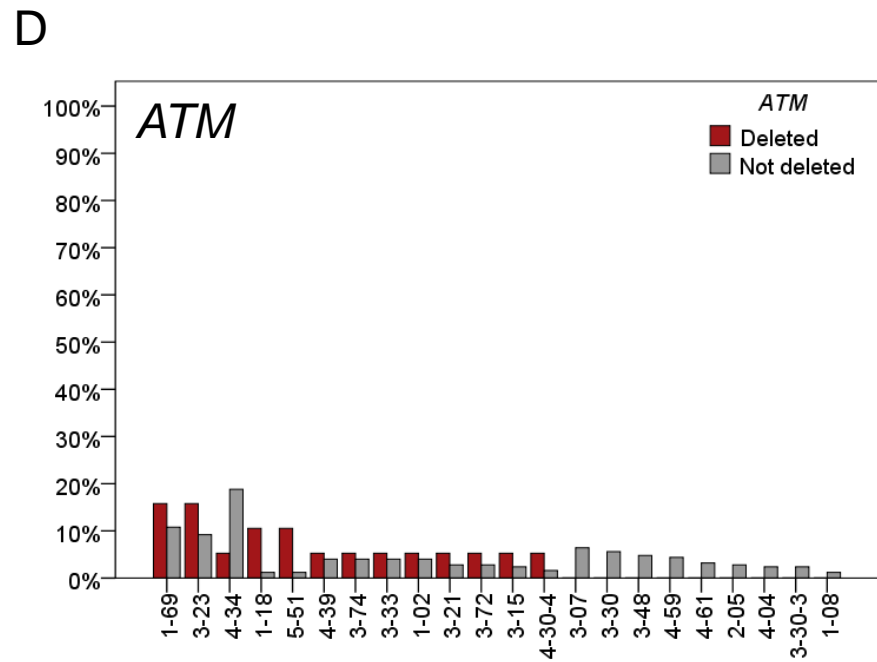

**Fig. S1**
